# Supplementary material for: Risk of Dementia Among Elderly Nursing Home Patients Using Paroxetine and Other Selective Serotonin Reuptake Inhibitors
Source: Atypon-hosted journal article supplement (doi:10.1176/appi.ps.201500011), 2015-08-03
Supplement: appi.ps.201500011.ds001.pdf [file appi.ps.201500011.ds001.pdf]

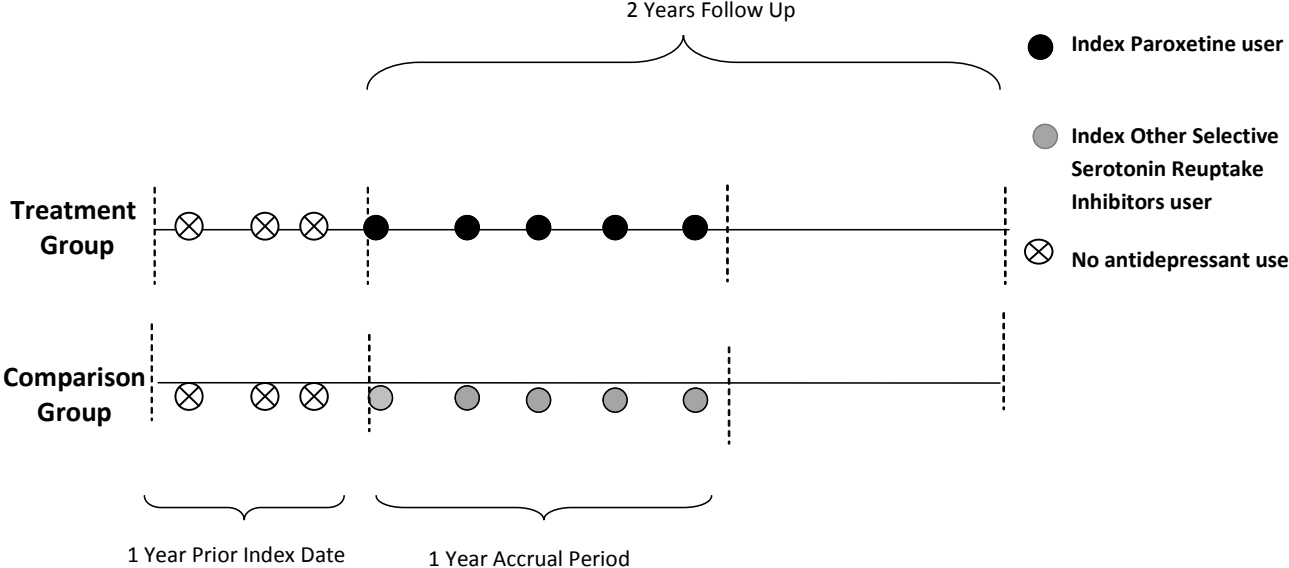

**Appendix A. Schematic Presentation of Cohort Construction**

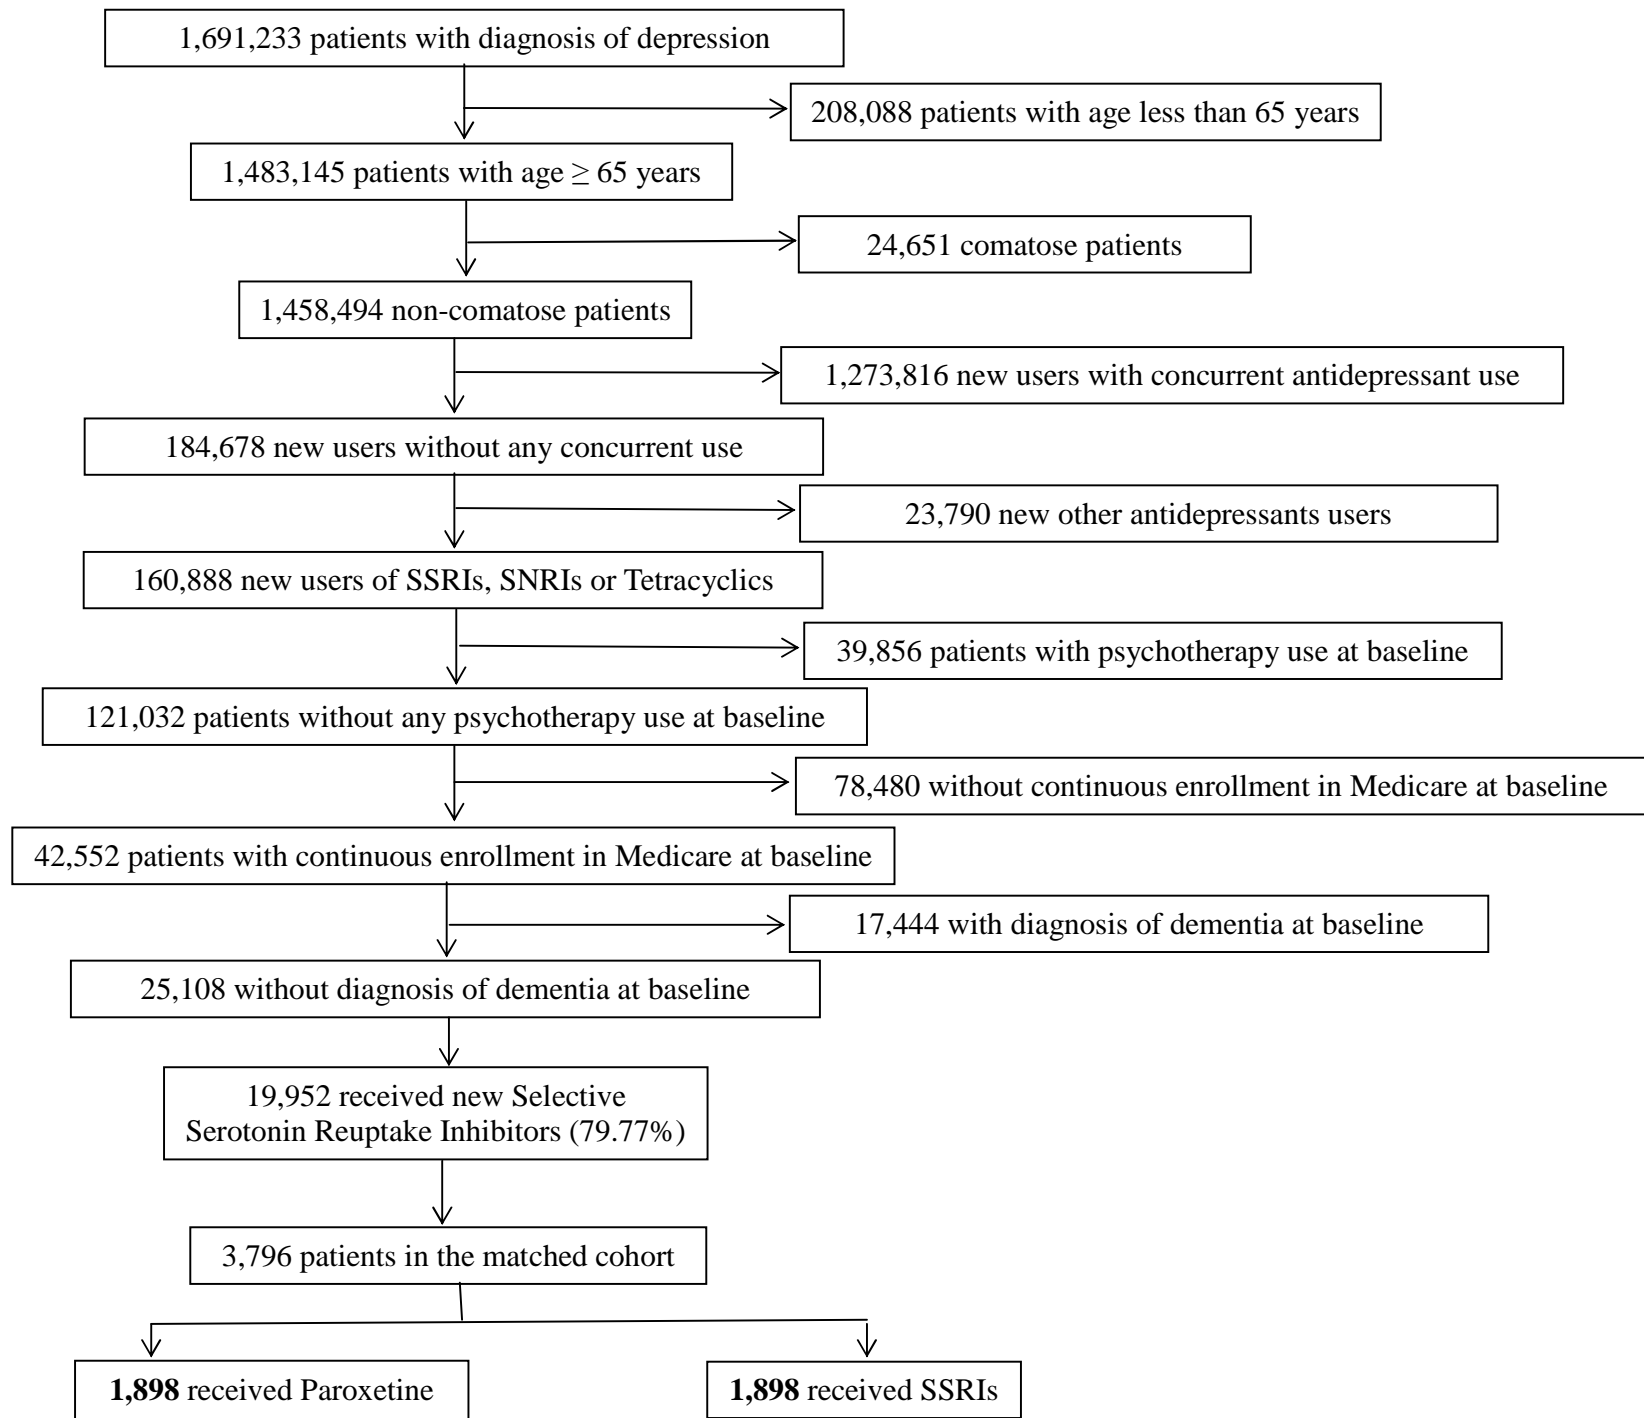

**Appendix B. Identification of Elderly Patients with Depression using Selective Serotonin Reuptake Inhibitors**

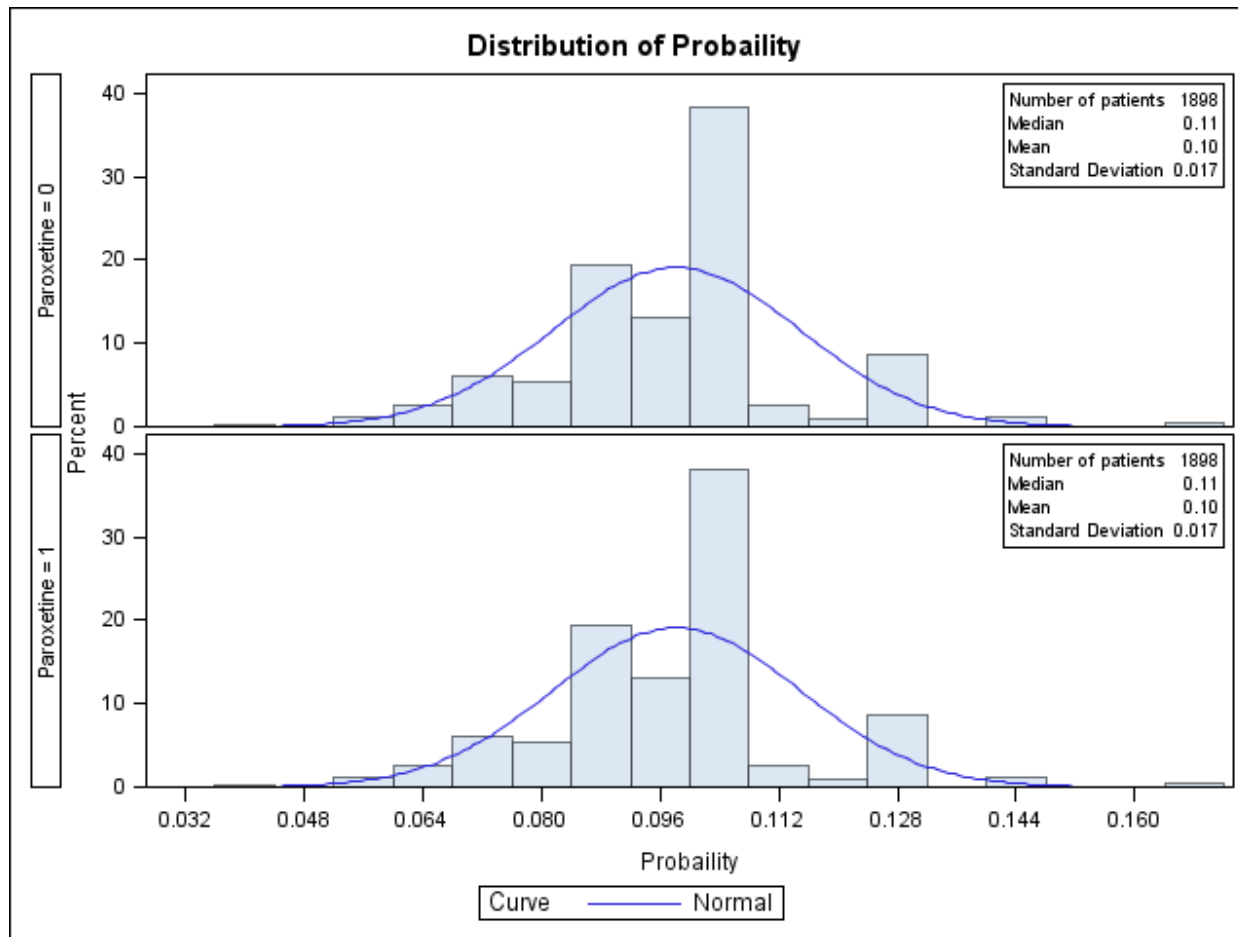

**Appendix C. Distribution of Propensity Scores among the Users of Paroxetine and Other Selective Serotonin Reuptake Inhibitors after Matching**
